# Supplementary material for: Zein-Derived Peptides from Corn Promote the Proliferation of C2C12 Myoblasts via Crosstalk of mTORC1 and mTORC2 Signaling Pathways
Source: MDPI journal article supplement (doi:10.3390/foods13060919), 2024-03-18
Supplement: s1 [file s1]

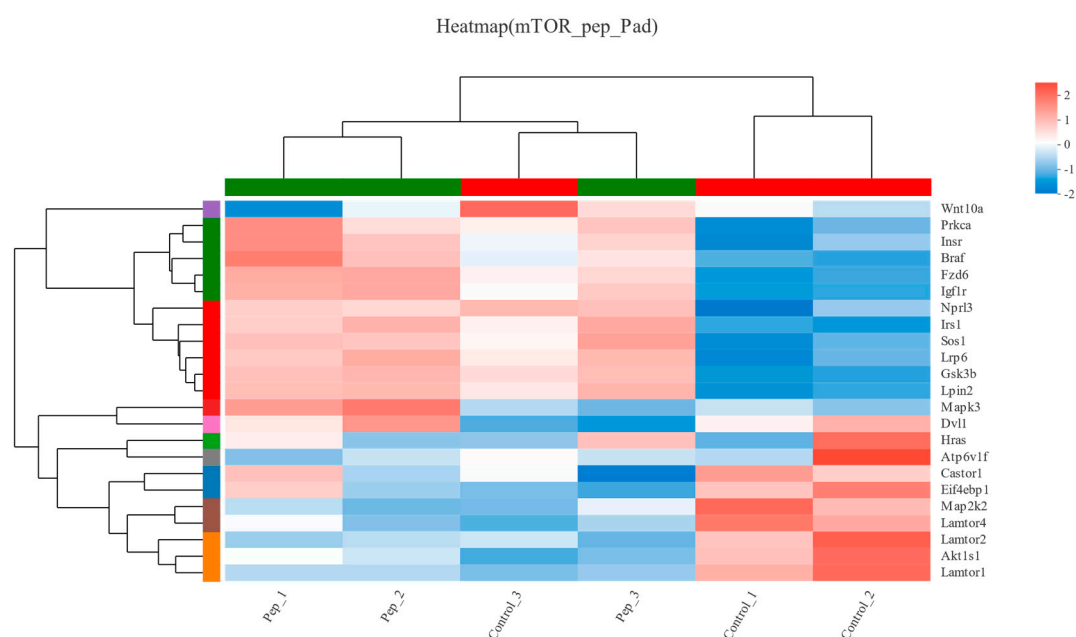

**Figure S1** The cluster heat map of differentially expressed genes in zein peptides group.

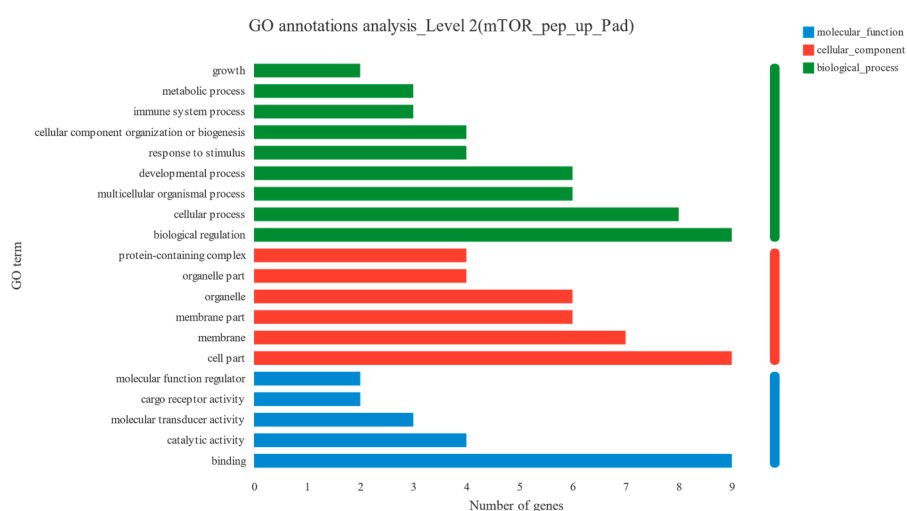

**Figure S2A** GO annotations of up-regulated genes in zein peptides group.

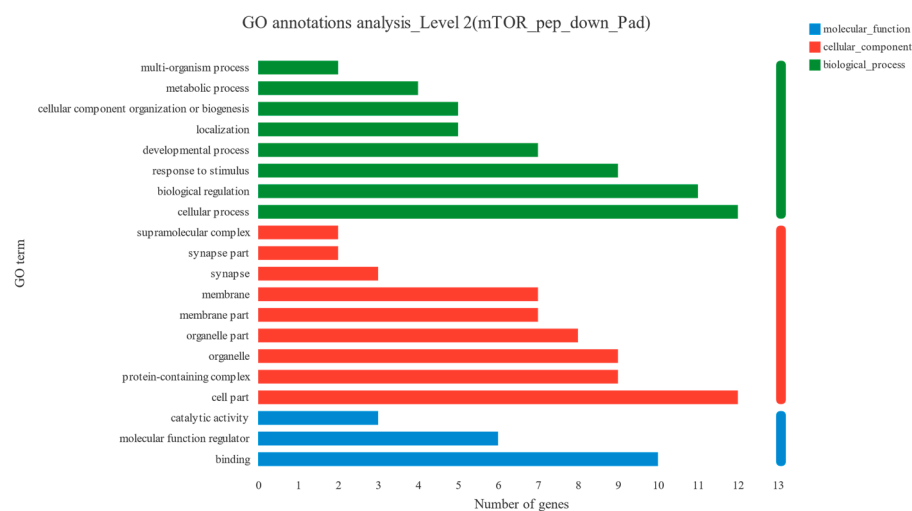

**Figure S2B** GO annotations of up-regulated genes in zein peptides group.

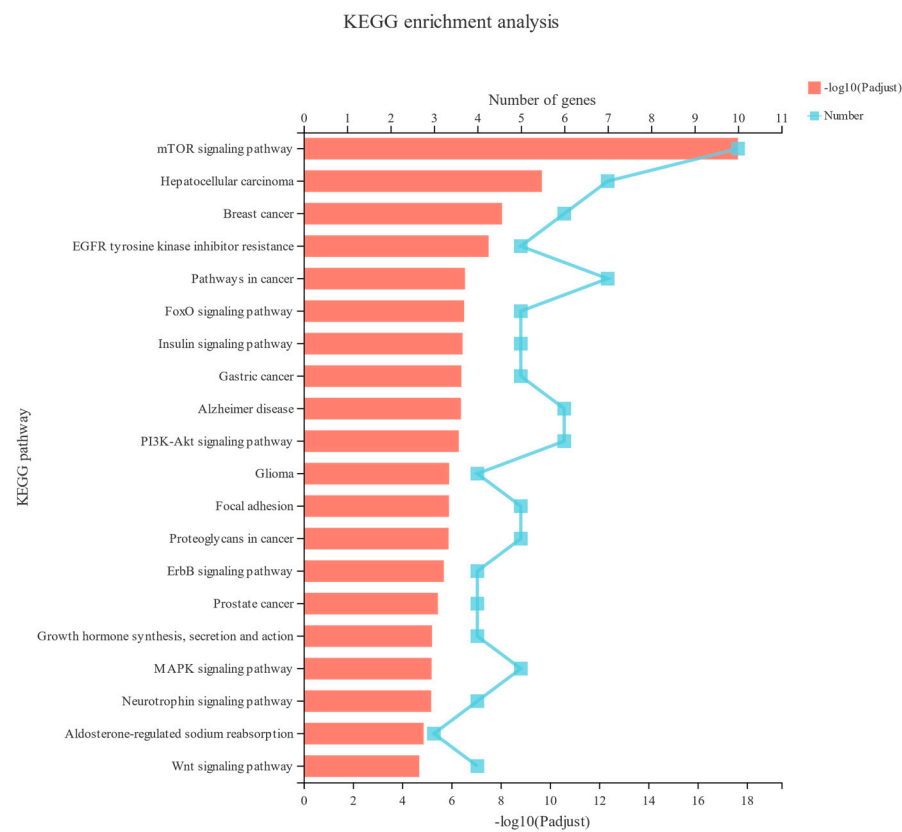

**Figure S3A** The functionally enriched KEGG pathways based on the up-regulated genes.

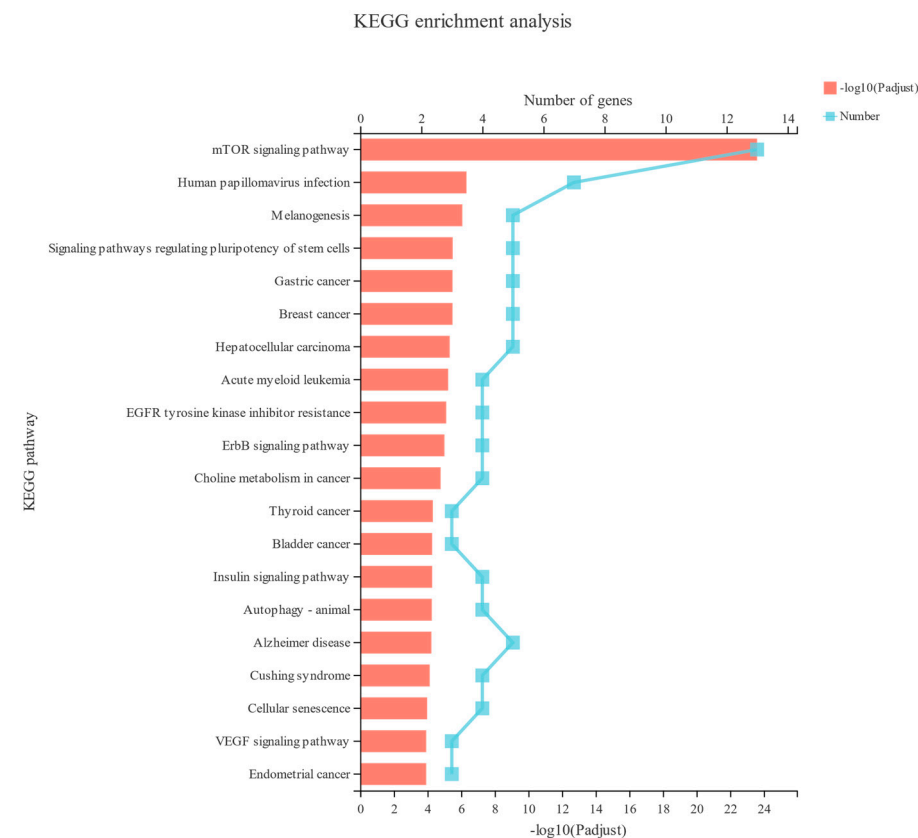

**Figure S3B** The functionally enriched KEGG pathways based on the down-regulated genes.

**Table S1. The representative zein peptide sequences identified by LC-MS/MS**

| <b>Peptides sequence</b> | <b>Intensity</b> | <b>Precursor protein</b>                    |
|--------------------------|------------------|---------------------------------------------|
| <b>LLPPYLPS</b>          | 2.06E+11         | z1B alpha zein protein                      |
| <b>SNIPLSPL</b>          | 1.67E+11         | z1A alpha zein protein                      |
| <b>FLPPVTSM</b>          | 1.48E+11         | z1C alpha zein protein                      |
| <b>SLLPPYLPS</b>         | 1.44E+11         | z1B alpha zein protein                      |
| <b>SLLPPYLSPA</b>        | 1.33E+11         | Z1A alpha zein protein                      |
| <b>ENPILQPY</b>          | 8.45E+10         | Z1A alpha zein protein                      |
| <b>LLPPYLSPA</b>         | 5.58E+10         | Z1A alpha zein protein                      |
| <b>YQQPIIGGA</b>         | 4.69E+10         | prolamin 19 kDa alpha zein z1A1_5 precursor |
| <b>ENPALQPY</b>          | 3.87E+10         | prolamin 19 kDa alpha zein z1B_6 precursor  |
| <b>GFEHPAVQ</b>          | 3.57E+10         | z1C alpha zein protein                      |
| <b>RQQLLNPL</b>          | 3.11E+10         | 22 kDa alpha-zein 14 precursor              |
| <b>RFEYPTIQ</b>          | 2.16E+10         | z1D alpha zein protein                      |
| <b>YQQPIIGG</b>          | 1.67E+10         | prolamin 19 kDa alpha zein z1A2_1 precursor |
| <b>QRQQLLNPL</b>         | 1.66E+10         | 22 kD alpha-zein                            |
| <b>LLPPYLSP</b>          | 1.49E+10         | Z1A alpha zein protein                      |
| <b>AAPNAGTLL</b>         | 1.43E+10         | prolamin 19 kDa alpha zein z1A1_7 precursor |
| <b>LPPYLSPA</b>          | 1.41E+10         | Z1A alpha zein protein                      |
| <b>QLLPFYYPQ</b>         | 1.04E+10         | z1D alpha zein protein                      |
| <b>ENPIVQPY</b>          | 9.87E+09         | prolamin 19 kDa alpha zein z1A2_2 precursor |
| <b>FLRPVTSM</b>          | 5.33E+09         | 22-kDa alpha zein 8                         |

Note: The bold front indicates BCAA.
